# Supplementary material for: The First Cry2Ac-Type Protein Toxic to Helicoverpa armigera: Cloning and Overexpression of Cry2ac7 Gene from SBS-BT1 Strain of Bacillus thuringiensis
Source: PubMed Central journal article supplement (PMC5705973; doi:10.3390/toxins9110358), 2017-11-03
Supplement: toxins-09-00358-s001.pdf [file toxins-09-00358-s001.pdf]

# Supplementary Materials: The First Cry2Ac-Type Protein Toxic to *Helicoverpa armigera*: Cloning and Overexpression of *Cry2ac7* Gene from SBS-BT1 Strain of *Bacillus thuringiensis*

Faiza Saleem and Abdul Rauf Shakoori

**Table S1.** Universal set of primers used for genotyping of *Bt* isolates for *cry 1*, *cry2* and *cry 4* genes.

| Sr. no. | Primer Pairs       | Primer Sequence (5'→3')                                                     | Gene Amplified           | Reference              |
|---------|--------------------|-----------------------------------------------------------------------------|--------------------------|------------------------|
| 1       | Un1(d)<br>Un1(r)   | 5'-CATGATTCATGCGGCAGATAAAAC-3'<br>5'-TTGTGACACTTCTGCTTCCCATT-3'             | <i>cry1</i> (Partial)    | Ben-Dov et al. (1997)  |
| 2       | Un2 (d)<br>Un2 (r) | GTTATTCTTAATGCAGATGAATGGG<br>CGGATAAAATAATCTGGGAAATAGT                      | <i>cry2</i> (Partial)    | Ben-Dov et al. (1997)  |
| 3       | Un4(d)<br>Un4(r)   | 5'-GTTATTCTTAATGCAGATGAATGGG-3'<br>5'-GCGTGACATACCCATTTCAGGTC-3'            | <i>cry4</i> (Partial)    | Ben-Dov et al. (1997)  |
| 4       | 1Ac F<br>1Ac R     | 5' GTATGCTTCTGTAACCCCGATTCACCTC 3'<br>5' CCTGCAGTCCCCTAAAATTCTAACACCTACTA 3 | <i>Cry1Ac</i> (Partial)  | Alberola et al. (1999) |
| 5       | 2Aa F<br>2Aa R     | 5' GGATATTGAGTGAATTATGGGGGATA 3'<br>5' CCGCTATAATTAACCCTGGCACTATTCAATGA 3   | <i>Cry2Aa</i> (Partial)  | Alberola et al. (1999) |
| 6       | 2Ab F<br>2Ab R     | 5' CACAGCAGACCCAATCATTACTTCACAAGA 3'<br>5' CTGTAAAAGCACCCTCTTAACCCTAAA 3'   | <i>Cry2Ab</i> (Partial)  | Alberola et al. (1999) |
| 7       | 2Ac F<br>2Ac R     | GGAGTGTCTCTAGCCGCATAGGTCAAG<br>ACCATAATATTCATAAGCTCAAATTGTGGATTG            | <i>cry2Ac</i> (Partial)  | Alberola et al. (1999) |
| 8       | 2AcT F<br>2AcT R   | ATGAATACTGTATTGAATAACGGAAG<br>CCTTAATAAAGTGGTGGGAAGATTAG                    | <i>cry2Ac</i> (Complete) | This study             |
| 9       | 67F<br>1671R       | TGAAAACCTGAACGAAACAAAC<br>CTCTCAAAACTGAACAAAACGAAA                          | 16S rDNA (Complete)      | Sacchi et al. (2002)   |

**Table S2.** Various local isolates of *B. thuringiensis* harboring *cry2* gene.

| Sr. No. | Catalogue No. | PCR Based Detection |               |             |             |
|---------|---------------|---------------------|---------------|-------------|-------------|
|         |               | <i>cry1</i>         | <i>cry1Ac</i> | <i>cry2</i> | <i>cry4</i> |
| 1       | HD29          | +                   | -             | Ab, Ac, Ad  | -           |
| 2       | CMBL-BT1      | +                   | -             | Aa, Ab, Ac  | +           |
| 3       | CMBL-BT2      | +                   | -             | Ab, Ac, Ad  | +           |
| 4       | CMBL-BT3      | +                   | -             | Ab, Ac      | +           |
| 5       | CMBL-BT4      | +                   | -             | Ac          | +           |
| 6       | CMBL-BT5      | +                   | -             | Ab, Ac, Ad  | +           |
| 7       | SBS-BT1       | -                   | -             | Ab, Ac      | -           |
| 8       | SBS-BT2       | -                   | -             | Aa          | +           |
| 9       | SBS-BT3       | -                   | -             | +           | -           |
| 10      | SBS-BT4       | -                   | -             | +           | +           |
| 11      | SBS-BT5       | -                   | -             | +           | +           |
| 12      | SBS-BT6       | -                   | -             | Ab, Ac      | +           |

**Table S3.** Internal primers used for sequencing full length genes.

| Serial No. | Internal Primers | Primer Sequence (5'→3')  | Gene Amplified                                  | Reference  |
|------------|------------------|--------------------------|-------------------------------------------------|------------|
| 1          | 2Ac 1            | GCACAGGCAGCCAATTTAC      | All for sequencing<br><i>cry2Ac</i> (Partial)   | This study |
| 2          | 2Ac 2            | GAGGTGGAGTGTCATCTAGC     |                                                 | This study |
| 3          | 2Ac 3            | GAGTGGCATGTATTGGAGATACGG |                                                 | This study |
| 4          | 2Ac 4            | GTAAATTGGCTGCCTGTGC      |                                                 | This study |
| 5          | 2Ac 5            | GCTAGATGACACTCCACCTC     |                                                 | This study |
| 6          | 2Ac 6            | CCGTATCTCCAATACATGCCACTC |                                                 | This study |
| 7          | 2Ad 1            | CCCTAACCGAAACGCTGTTC     | All for sequencing<br><i>cry2Ad</i> (Partial)   | This study |
| 8          | 2Ad 2            | GGAGGAATTACATCTGGTAG     |                                                 | This study |
| 9          | 2Ad 3            | CCGGCGCTAAATGAATC        |                                                 | This study |
| 10         | 2Ad 4            | GGAACAGCGTTTCGGTTAGGG    |                                                 | This study |
| 11         | 2Ad 5            | CTACCAGATGTAATTCCTCT     |                                                 | This study |
| 12         | 2Ad 6            | GATTCATTTAGCGCCGG        |                                                 | This study |
| 13         | 16S 1            | GAAAGTCTGACGGAGCAACGC    | All for sequencing<br><i>16S rDNA</i> (Partial) | This study |
| 14         | 16S 2            | GGTCTTGACATCCTCTGAC      |                                                 | This study |
| 15         | 16S 3            | GATCAAGGGTTGCGCTCGTTGC   |                                                 | This study |
| 16         | 16S 4            | GCGTTGCTCCGTCAGACTTTC    |                                                 | This study |
| 17         | 16S 5            | GTCAGAGGATGTCAAGACC      |                                                 | This study |
| 18         | 16S 6            | GCAACGAGCGCAACCCTTGATC   |                                                 | This study |
